# Supplementary material for: Lung eQTLs to Help Reveal the Molecular Underpinnings of Asthma
Source: PubMed Central journal article supplement (PMC3510026; doi:10.1371/journal.pgen.1003029), 2012-11-29
Supplement: pgen.1003029.s001.pdf [file pgen.1003029.s001.pdf]

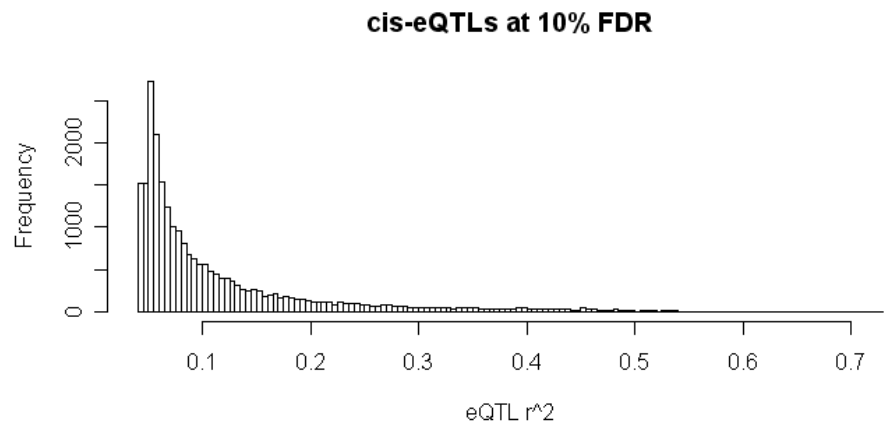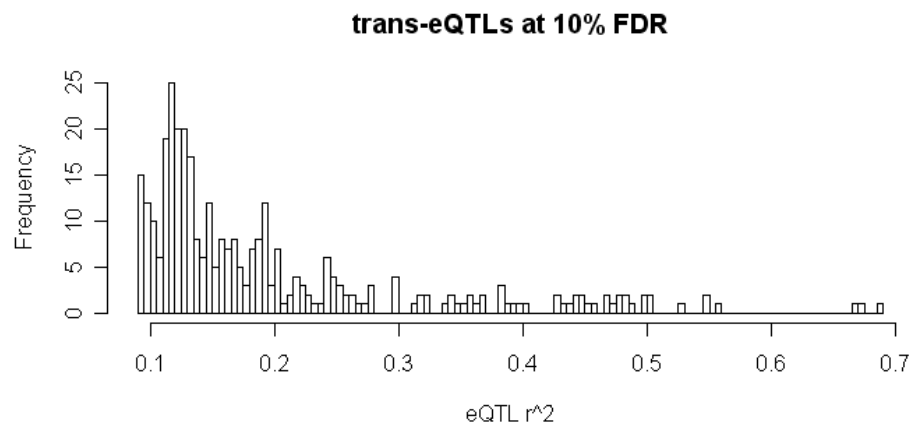

**Figure S1.**
