# Supplementary material for: Lung eQTLs to Help Reveal the Molecular Underpinnings of Asthma
Source: PubMed Central journal article supplement (PMC3510026; doi:10.1371/journal.pgen.1003029), 2012-11-29
Supplement: pgen.1003029.s005.pdf [file pgen.1003029.s005.pdf]

**Table S1.** Mean (Median) of regression  $r^2$  in expressional QTLs

| <b>Cohort</b> |                     | 1% FDR       | 5% FDR       | 10% FDR      |
|---------------|---------------------|--------------|--------------|--------------|
| Laval         | <i>cis</i> -eQTLs   | 0.140(0.098) | 0.122(0.080) | 0.112(0.071) |
|               | <i>trans</i> -eQTLs | 0.203(0.145) | 0.194(0.135) | 0.181(0.128) |
| Groningen     | <i>cis</i> -eQTLs   | 0.143(0.106) | 0.124(0.087) | 0.112(0.076) |
|               | <i>trans</i> -eQTLs | 0.228(0.192) | 0.205(0.165) | 0.191(0.149) |
| UBC           | <i>cis</i> -eQTLs   | 0.157(0.113) | 0.138(0.096) | 0.128(0.086) |
|               | <i>trans</i> -eQTLs | 0.241(0.188) | 0.224(0.182) | 0.218(0.178) |
