# Supplementary material for: Lung eQTLs to Help Reveal the Molecular Underpinnings of Asthma
Source: PubMed Central journal article supplement (PMC3510026; doi:10.1371/journal.pgen.1003029), 2012-11-29
Supplement: pgen.1003029.s007.pdf [file pgen.1003029.s007.pdf]

**Table S3.** Six Key Driver Analyses (KDA) genes that remains significant after correction for multiple testing

| <b>Key Driver</b> | <b><i>P</i></b> | <b>Corrected-<i>P</i></b> | <b>q-value</b> | <b>Hits*</b> |
|-------------------|-----------------|---------------------------|----------------|--------------|
| CXCR3             | 3.27E-10        | 1.17E-06                  | 3.28E-04       | 16           |
| CCL2              | 8.71E-07        | 3.10E-03                  | 3.28E-04       | 13           |
| CXCL2             | 3.00E-06        | 1.07E-02                  | 3.28E-04       | 10           |
| SOCS3             | 1.95E-05        | 6.93E-02                  | 1.72E-03       | 12           |
| IL1B              | 6.78E-05        | 2.42E-01                  | 4.13E-03       | 6            |
| CD200R1           | 9.98E-05        | 3.56E-01                  | 4.59E-03       | 5            |

\* Hits is the number of gene that are from the canonical list that are also three edges away from the Key Driver gene
