# Supplementary material for: Lung eQTLs to Help Reveal the Molecular Underpinnings of Asthma
Source: PubMed Central journal article supplement (PMC3510026; doi:10.1371/journal.pgen.1003029), 2012-11-29
Supplement: pgen.1003029.s008.pdf [file pgen.1003029.s008.pdf]

**Table S4a.** Biological functions of the Bayesian network surrounding *GSDMA*

| <b>Name</b>                                                        | <b>Expectation*</b> | <b>Source</b> | <b>P</b> |
|--------------------------------------------------------------------|---------------------|---------------|----------|
| immune response-regulating cell surface receptor signaling pathway | 0.002479            | GO_process    | 8.34E-07 |
| T cell receptor signaling pathway                                  | 0.006371            | GO_process    | 2.15E-06 |
| leukocyte proliferation                                            | 0.009159            | GO_process    | 3.09E-06 |
| immune response-regulating signaling pathway                       | 0.011614            | GO_process    | 3.92E-06 |
| antigen receptor-mediated signaling pathway                        | 0.02516             | GO_process    | 8.56E-06 |
| immune response-activating cell surface receptor signaling pathway | 0.031045            | GO_process    | 1.06E-05 |
| regulation of immune response                                      | 0.032261            | GO_process    | 1.10E-05 |
| lymphocyte proliferation                                           | 0.035811            | GO_process    | 1.22E-05 |
| mononuclear cell proliferation                                     | 0.038009            | GO_process    | 1.30E-05 |

\*Corrected for multiple testing.

**Table S4b.** Biological functions of the co-expression module harboring *GS DMA*

| <b>name</b>                                            | <b>Expectation*</b> | <b>source</b> | <b>P</b> |
|--------------------------------------------------------|---------------------|---------------|----------|
| Allograft rejection                                    | 1.01E-08            | kegg          | 3.68E-12 |
| antigen processing and presentation                    | 6.64E-08            | GO_process    | 2.43E-11 |
| immune system process                                  | 4.30E-07            | GO_process    | 1.58E-10 |
| Graft-versus-host disease                              | 1.41E-06            | kegg          | 5.15E-10 |
| Autoimmune thyroid disease                             | 1.76E-06            | kegg          | 6.46E-10 |
| Viral myocarditis                                      | 2.18E-06            | kegg          | 8.00E-10 |
| immune response                                        | 3.33E-06            | GO_process    | 1.22E-09 |
| Type I diabetes mellitus                               | 1.55E-05            | kegg          | 5.68E-09 |
| antigen processing and presentation of peptide antigen | 6.09E-05            | GO_process    | 2.23E-08 |
| Antigen processing and presentation                    | 1.29E-04            | kegg          | 4.72E-08 |
| Intestinal immune network for IgA production           | 1.81E-04            | kegg          | 6.62E-08 |
| Cell adhesion molecules (CAMs)                         | 2.21E-04            | kegg          | 8.08E-08 |
| regulation of immune system process                    | 0.001243            | GO_process    | 4.55E-07 |
| Asthma                                                 | 0.002561            | kegg          | 9.39E-07 |
| response to virus                                      | 0.016771            | GO_process    | 6.19E-06 |
| T cell activation                                      | 0.020734            | GO_process    | 7.67E-06 |
| multi-organism process                                 | 0.06281             | GO_process    | 2.38E-05 |
| regulation of lymphocyte activation                    | 0.077555            | GO_process    | 2.96E-05 |
| lymphocyte activation                                  | 0.081983            | GO_process    | 3.13E-05 |

\*Corrected for multiple testing.
