# Supplementary material for: Lung eQTLs to Help Reveal the Molecular Underpinnings of Asthma
Source: PubMed Central journal article supplement (PMC3510026; doi:10.1371/journal.pgen.1003029), 2012-11-29
Supplement: pgen.1003029.s009.pdf [file pgen.1003029.s009.pdf]

Asthma candidate genes

ABO

ACE

ACP1

ACVR1

ADA

ADAM33

ADAM8

ADCY9

ADH5

AGT

AICDA

AKR1C3

ALDH2

ALOX15

ALOX5AP

ANXA2

AOAH

ARG1

ARG2

BAT1

BCL2

BCL2L1

BDKRB1

BDKRB2

BDNF

BMP2

BMP4

BMP7

BMPR1A

BMPR1B

C3

C3AR1

C5

C5orf20

CAMP

CAT

CCL11

CCL2

CCL28

CCR1

CCR3

CCR5  
CCR9  
CD14  
CD28  
CD40  
CD69  
CD86  
CDH1  
CDKN1A  
CFL1  
CFTR  
CHI3L1  
CHIA  
CHIT1  
CHML  
CHRM1  
CHRM2  
CHRM3  
CLCA1  
CMA1  
COL1A1  
COMT  
CREB1  
CRHR1  
CRHR2  
CRP  
CSF2RB  
CTLA4  
CTNNA1  
CTNNA3  
CX3CR1  
CXCL10  
CYBA  
CYP1A1  
CYP1A2  
CYP2C9  
CYP2J2  
CYP2R1  
CYP4F3  
CYSLTR1  
CYSLTR2  
DAP3

DEFB1  
DPP10  
EDNRA  
EDNRB  
EFNA1  
EGFR  
EHF  
ELAC2  
ELF5  
EPHX2  
F2RL1  
FCAR  
FCER1G  
FCGR2A  
FGF2  
FGFBP2  
FLG  
FLT3LG  
FMR1  
FOXP3  
FUT2  
FUT3  
FYN  
GATA3  
GC  
GCLC  
GHRL  
GIF  
GNAS  
GNB1  
GPR44  
GPX1  
GSTA1  
GSTM3  
GSTO2  
GSTP1  
GSTT1  
HAVCR1  
HAVCR2  
HEXB  
HLA-A  
HLA-B

HLA-C  
HLA-DRB3  
HLA-G  
HNMT  
HRH2  
IFNA1  
IFNAR1  
IFNGR1  
IFNGR2  
IKBKAP  
IL10  
IL10RA  
IL12A  
IL12RB1  
IL12RB2  
IL13RA1  
IL15  
IL16  
IL17F  
IL18  
IL18R1  
IL18RAP  
IL19  
IL1A  
IL1R1  
IL1RL1  
IL1RN  
IL21  
IL27  
IL31  
IL8  
IL9R  
INHA  
INPP4A  
ITGA4  
ITGA6  
ITGB3  
ITGB7  
ITK  
ITLN1  
JUND  
KCNMB1

KCNS3  
KDR  
LAMA5  
LELP1  
LEP  
LEPR  
LGALS3  
LTA4H  
LTB  
LTB4R  
LTC4S  
MBL2  
MICB  
MIF  
MMP1  
MMP21  
MMP28  
MPO  
MS4A1  
MS4A3  
MTHFR  
MUC5AC  
MUC7  
MYH11  
MYLK  
NAT1  
NAT2  
NFKB2  
NFKBIL1  
NOD2  
NOS1  
NOS3  
NOX4  
NPSR1  
NQO1  
NR3C1  
NRIP2  
NTF3  
ORMDL3  
PAFAH1B1  
PDGFA  
PDGFRA

PHF11  
PLA2G4A  
PLA2G7  
PLAUR  
PMCH  
PPARG  
PTAFR  
PTGDR  
PTGER1  
PTGER2  
PTGER3  
PTGER4  
PTGFR  
PTGIR  
PTGS1  
PTGS2  
PTPRD  
RASGRP4  
RIPK2  
RNASE3  
ROM1  
RUNX1  
SCGB1A1  
SCGB3A2  
SELP  
SERBP1  
SERPINA3  
SERPINB3  
SFRP1  
SIGIRR  
SIGLEC8  
SLC11A1  
SLC26A4  
SMAD2  
SOCS1  
SOD2  
SPINK5  
SPP1  
STAT2  
STAT3  
STAT4  
TAC1

TAGLN  
TBX21  
TBXA2R  
TGFB1  
TGFB2  
TGFB1  
TIMD4  
TJP1  
TLR1  
TLR10  
TLR2  
TLR3  
TLR6  
TLR7  
TLR8  
TLR9  
TNC  
TNFRSF10A  
TNFRSF10B  
TNFRSF14  
TNXB  
TPSD1  
TPSG1  
TPT1  
TSLP  
VDR  
VEGFA  
WDR36  
XDH
